# Supplementary material for: ALDH1A1 regulates postsynaptic μ–opioid receptor expression in dorsal striatal projection neurons and mitigates dyskinesia through transsynaptic retinoic acid signaling
Source: PubMed Central journal article supplement (PMC6401150; doi:10.1038/s41598-019-40326-x), 2019-03-05
Supplement: 41598_2019_40326_MOESM1_ESM.pdf [file 41598_2019_40326_MOESM1_ESM.pdf]

**ALDH1A1 regulates postsynaptic  $\mu$ -opioid receptor expression in the dorsal striatal projection neurons and mitigates dyskinesia through transsynaptic retinoic acid signaling**

Jing Pan<sup>1,2</sup>, Jia Yu<sup>3</sup>, Sarah Hawes<sup>2</sup>, Junbing Wu<sup>2</sup>, Lixin Sun<sup>2</sup>, Chengsong Xie<sup>2</sup>, Lisa Chang<sup>2</sup>, Sara Saez-Atienzar<sup>2</sup>, Wang Zheng<sup>2, #</sup>, Justin Kung<sup>2</sup>, Jinhui Ding<sup>4</sup>, Weidong Le<sup>5</sup>, Shengdi Chen<sup>1, \*</sup>, and Huaibin Cai<sup>2, \*, ^</sup>

**Supplementary figures, figure legends, and video legend**

**Fig. S1**

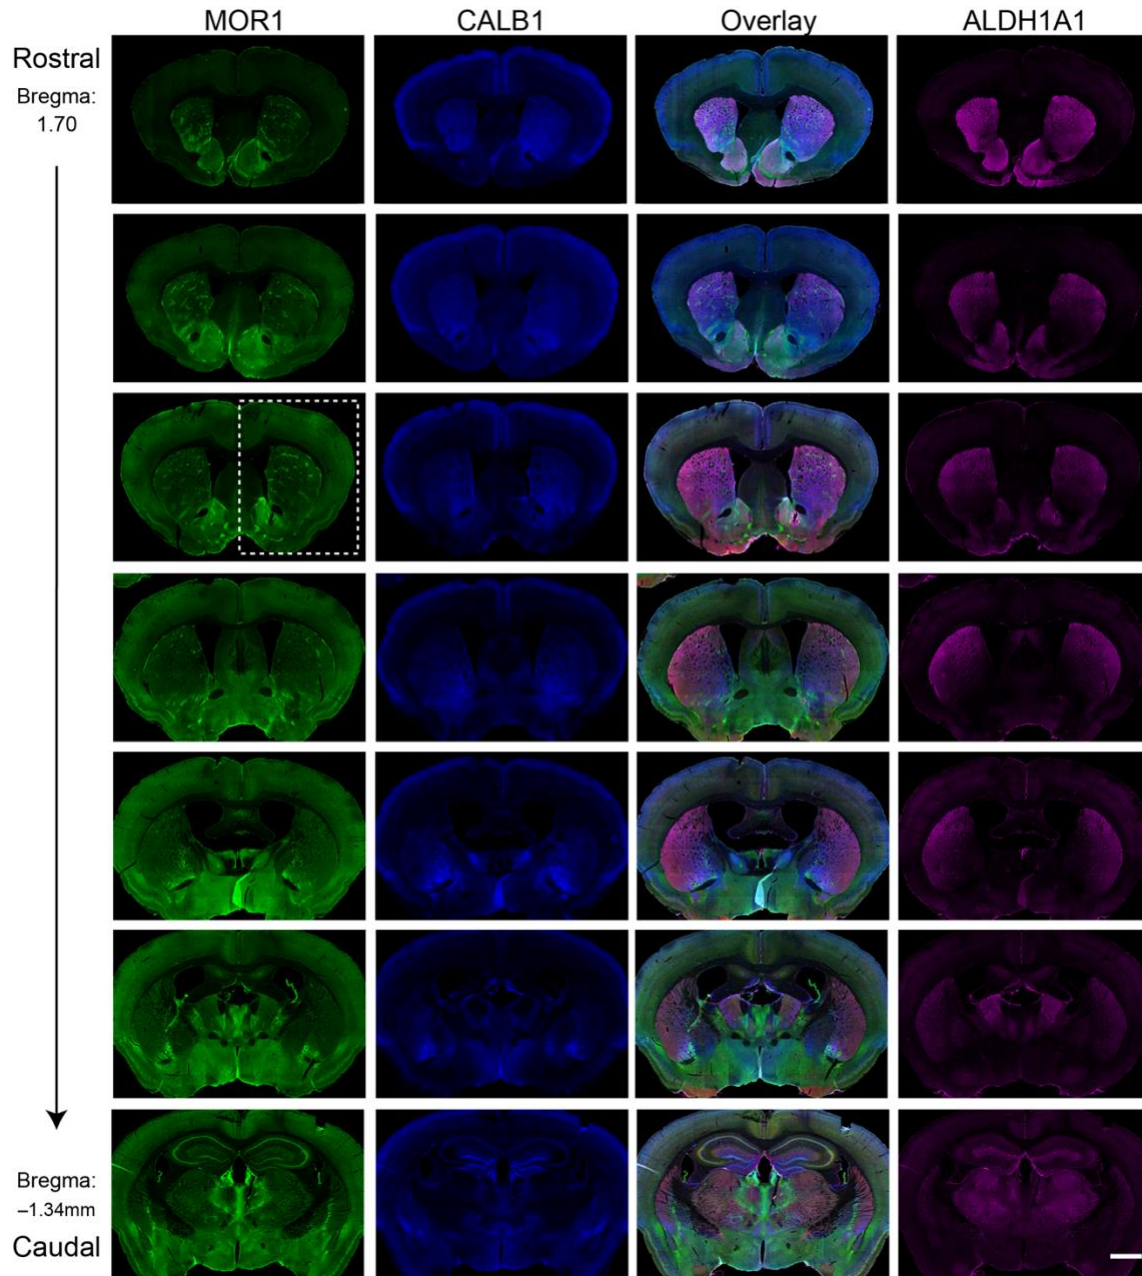

**Fig. S1 Uneven distribution of MOR1 and ALDH1A1 staining in the dorsal striatum.** Images show MOR1, CALB1, and ALDH1A1 co-staining in sequential coronal sections evenly sampled across the entire striatum of 3-month-old *Aldh1a1*<sup>+/+</sup> mice. MOR1-positive striosomes are mainly distributed in the rostral-dorsal portions of dorsal striatum, which are under more intense innervation of ALDH1A1-positive axons. The boxed area was highlighted in Fig. 1b. Scale bar: 1000 $\mu$ m.

**Fig. S2**

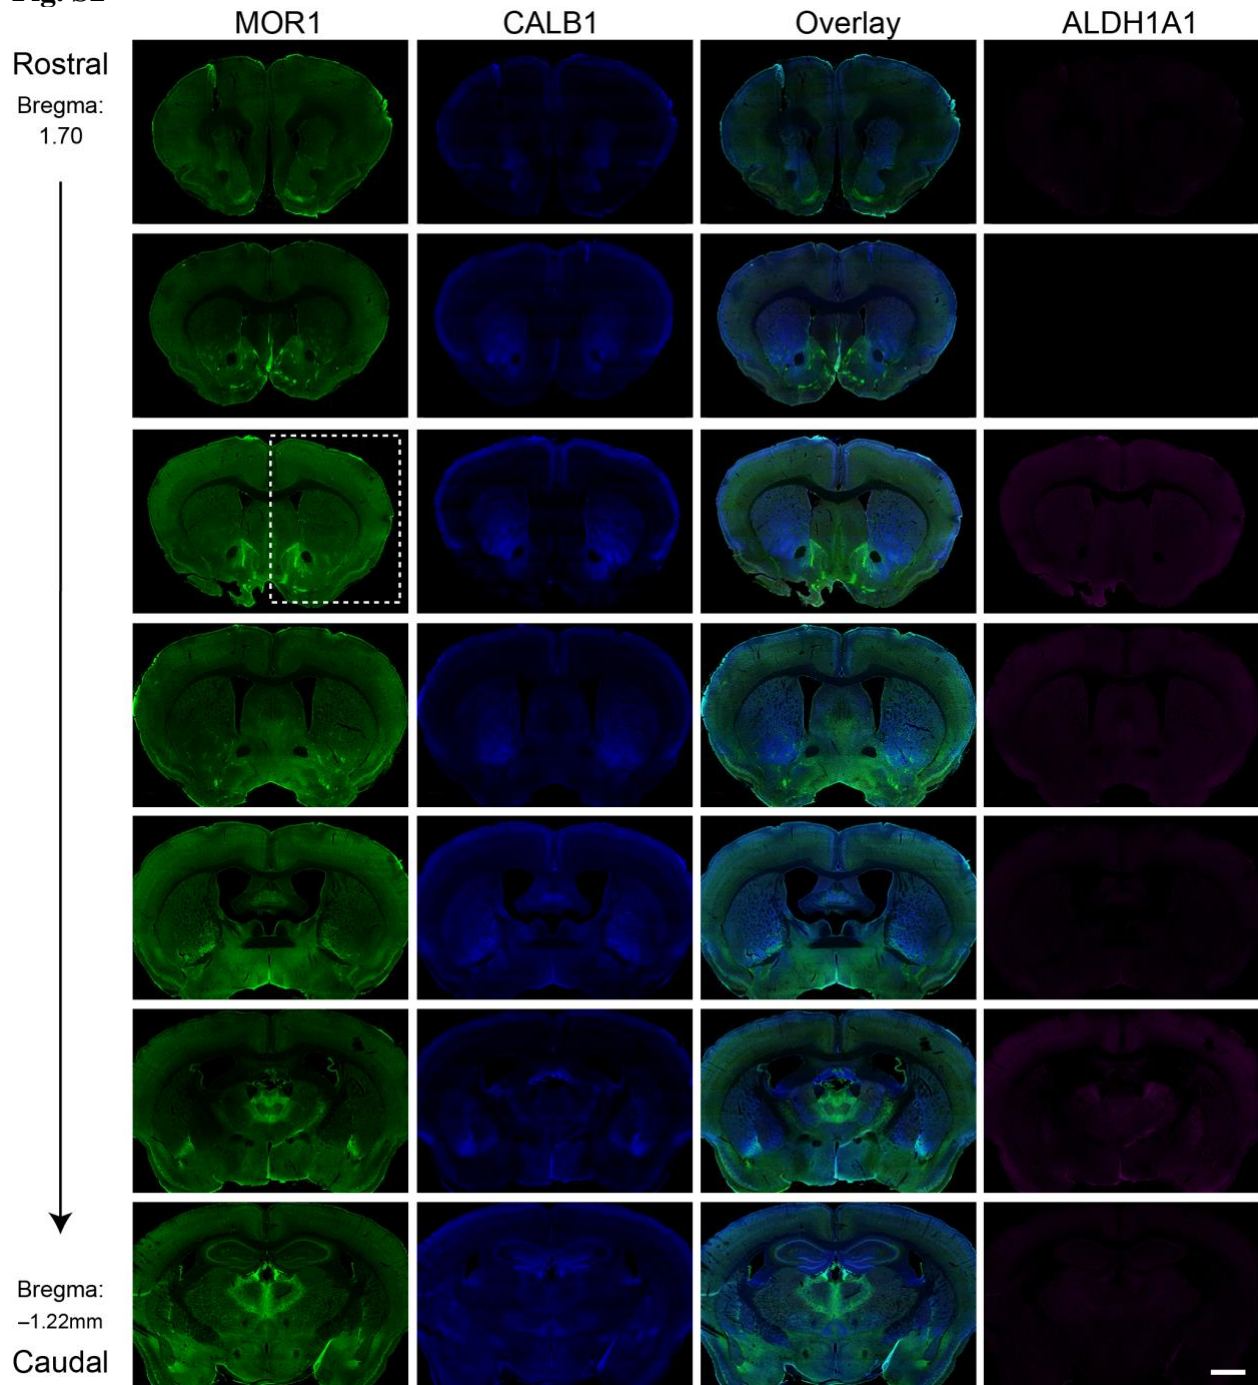

**Fig. S2 Substantial reduction of MOR1 staining in the dorsal striatum of *Aldh1a1*<sup>-/-</sup> mice.** Images show MOR1, CALB1, and ALDH1A1 co-staining in sequential coronal sections evenly sampled across the entire striatum of 3-month-old *Aldh1a1*<sup>-/-</sup> mice. MOR1 staining was severely reduced in the dorsal portions of dorsal striatum. The boxed area was highlighted in Fig. 1b. Scale bar: 1000 $\mu$ m.

**Fig. S3**

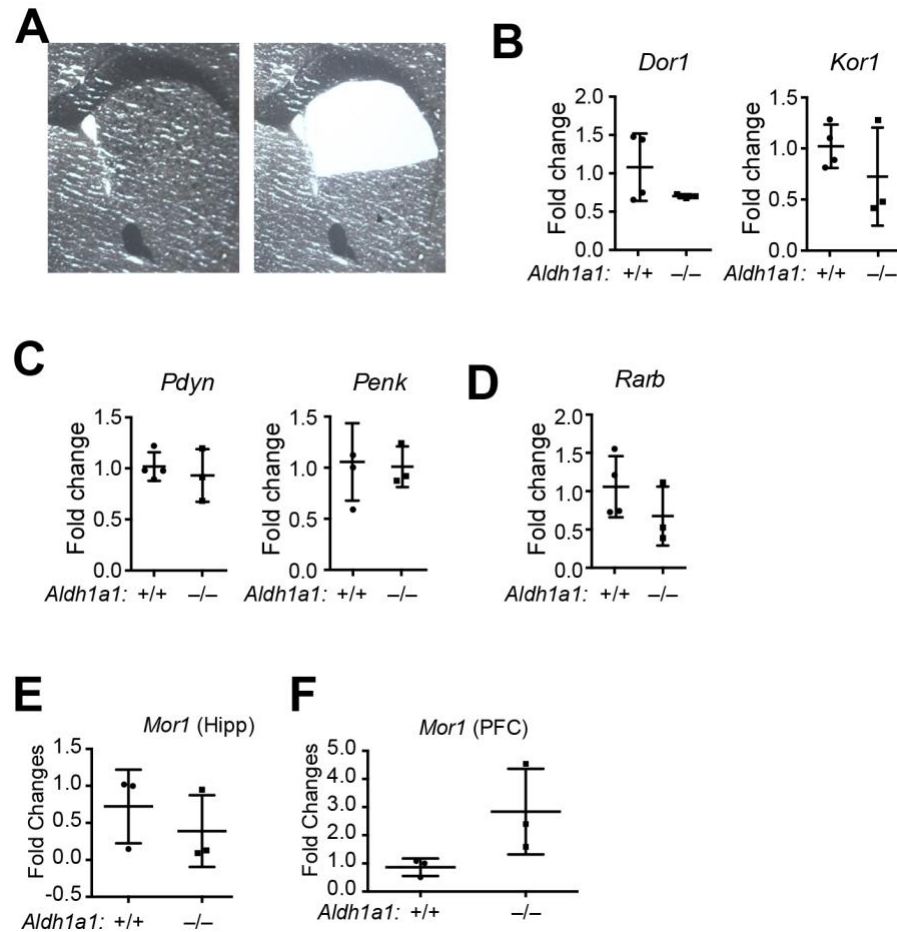

**Fig. S3 Quantification of endogenous opioid receptor and ligand mRNA expression in the dorsal portion of dorsal striatum and other brain regions.** (A) Images show coronal striatal sections before and after removal of DS by laser microdissection for the follow-up qRT-PCR analyses. (B–D) Scatter plots depict the expression of endogenous opioid receptor *Dor1* and *Kor1* (B), ligand *Pdyn* and *Penk* (C), and retinoic acid receptor *RARβ* (D) mRNAs in the DS of 3-month-old *Aldh1a1*<sup>+/+</sup> (n=4) and *Aldh1a1*<sup>-/-</sup> (n=3) mice by qRT-PCR. Data were presented as mean ± SEM. Unpaired t test was used for statistical analysis, followed by *post hoc* tests. No significant difference was found. (E, F) Expression of *Mor1* mRNA in the hippocampus (Hipp) and prefrontal cortex (PFC) of 3-month-old *Aldh1a1*<sup>+/+</sup> (n=3) and *Aldh1a1*<sup>-/-</sup> (n=3) mice by qRT-PCR. Data were presented as mean ± SEM. Unpaired t test was used for statistical analysis, followed by *post hoc* tests. No significant difference was found.



**Fig. S4**

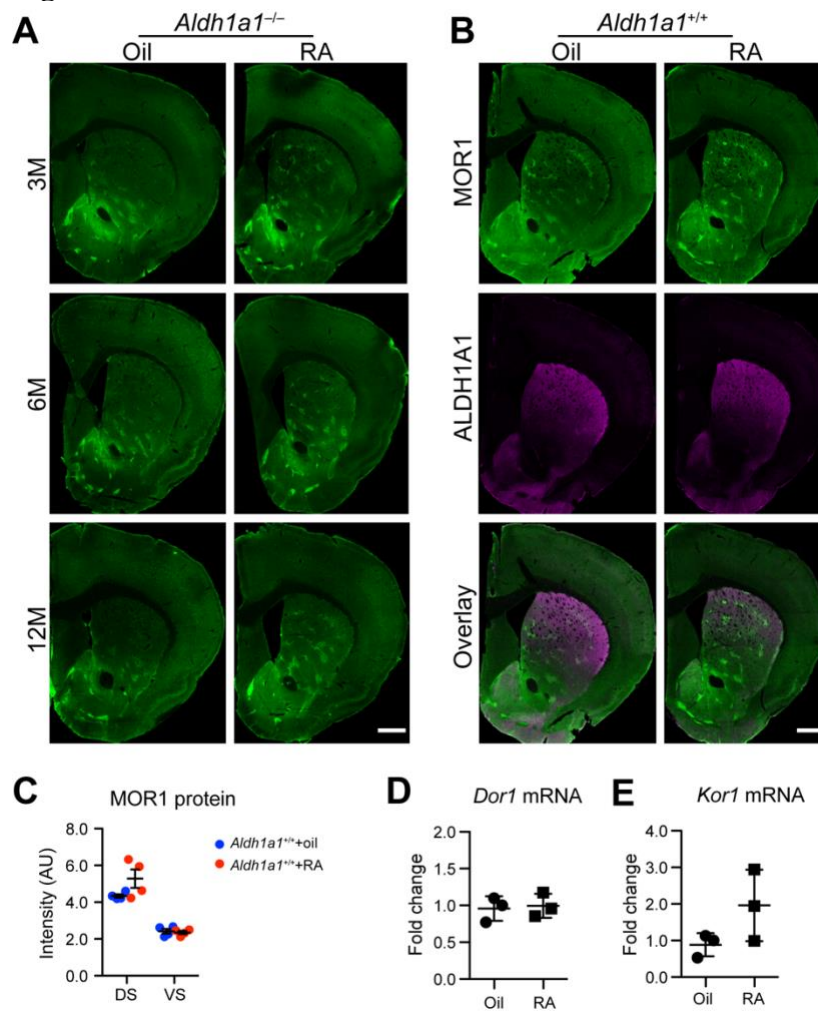

**Fig. S4 RA treatment increases MOR1 expression in the dorsal striatum of *Aldh1a1*<sup>-/-</sup> mice at different age.** (A) MOR1 staining in the selective striatal coronal sections of *Aldh1a1*<sup>-/-</sup> mice treated with oil or RA at different age. Scale bar: 1000 $\mu$ m. (B) MOR1 and ALDH1A1 co-staining in the selective striatal coronal sections of 3-month-old *Aldh1a1*<sup>+/+</sup> mice treated with oil or RA. Scale bar: 1000 $\mu$ m. (C) Scatter plot shows the signal intensities of MOR1 staining in the DS and VS of *Aldh1a1*<sup>+/+</sup> treated with oil or RA (n=4 animals per genotype per age group, 3 sequential coronal sections per animal). Data were presented as mean  $\pm$  SEM. Two-way ANOVA followed by Sidak's multiple comparisons test, no significant difference. (D, E) Expression of *Dor1* (D) and *Kor1* (E) mRNA in the DS of 3-month-old *Aldh1a1*<sup>-/-</sup> (n=3) mice treated with oil or RA by qRT-PCR. Data were presented as mean  $\pm$  SEM. One-way ANOVA was used for statistical analysis, followed by *post hoc* tests. No significant difference was found.

**Fig. S5**

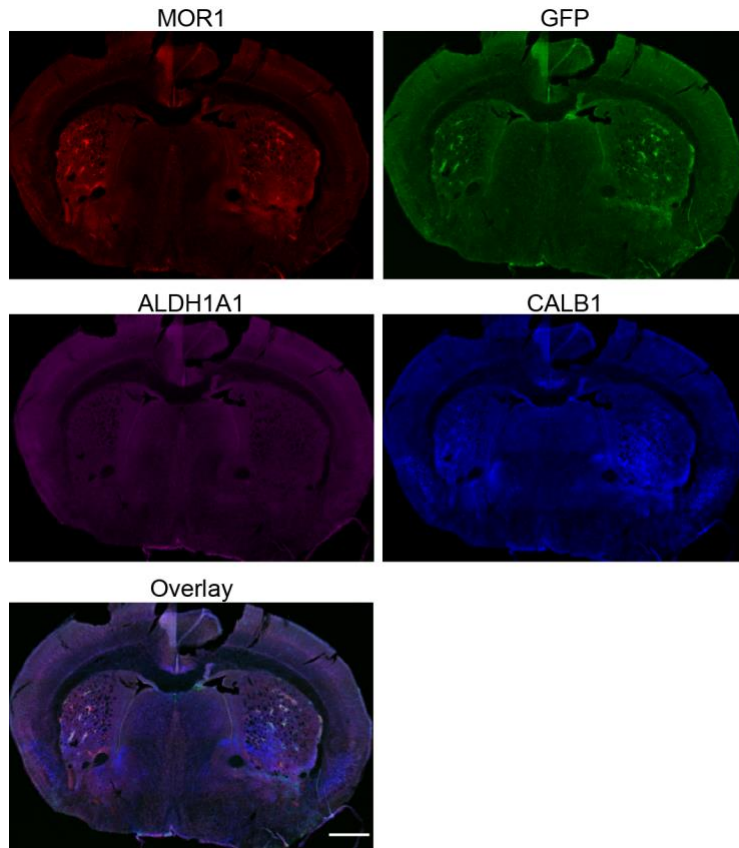

**Fig. S5 No apparent alterations of MOR1 expression pattern and striosome/matrix compartmentation in P0 *Nr4a1-GFP/Pitx3<sup>ak/ak</sup>* mice.** Representative images show MOR1, GFP, ALDH1A1, and CALB1 co-staining in the striatal coronal sections P0 *Nr4a1-GFP* transgenic pups with *Pitx3<sup>ak/ak</sup>* background. Scale bar: 1000 $\mu$ m.

**Fig. S6**

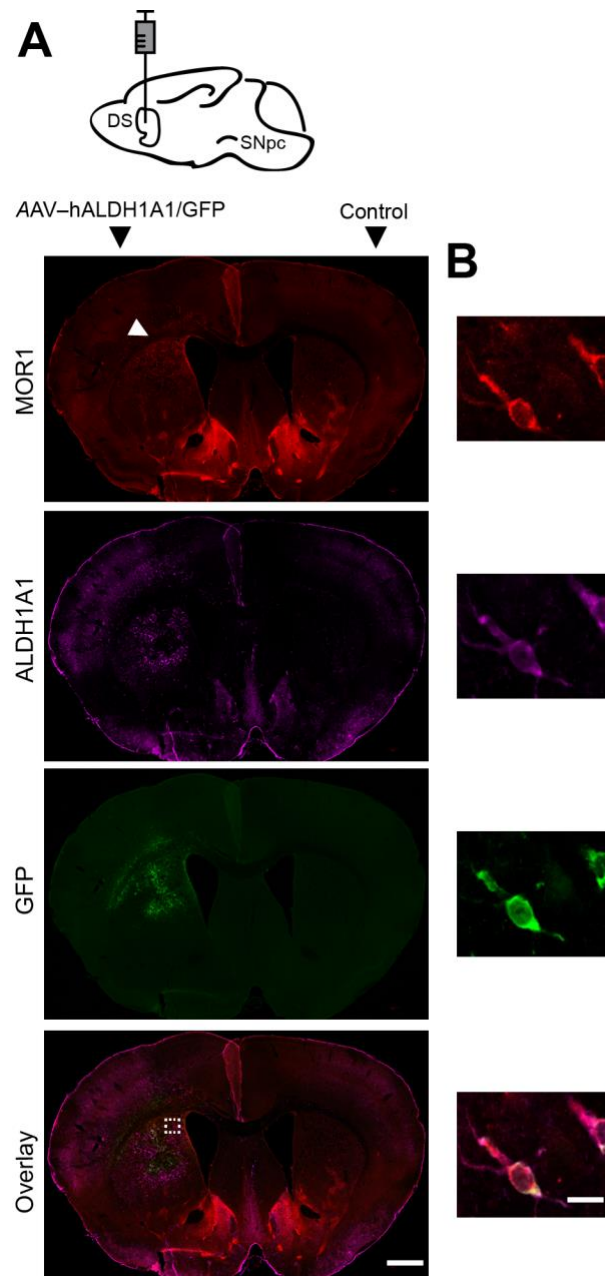

**Fig. S6 Ectopic expression of ALDH1A1 in the dorsal striatum increases MOR1 levels in *Pitx3*<sup>ak/ak</sup> SPNs.** (A) Cartoon indicates the needle placement in one side of dorsal striatum for stereotaxic injection of AAVs co-expressing human ALDH1A1 and GFP<sup>1</sup>. Representative images show MOR1, ALDH1A1, and GFP co-staining in the striatal coronal sections of 3-month-old *Pitx3*<sup>ak/ak</sup> mice injected with AAVs at one hemisphere. Arrowhead points to the MOR1 staining in the dDS in the hemisphere injected with *hALDH1A1*-expressing AAVs. Scale bar: 1000 $\mu$ m. (B) Enlarged images from the boxed region in (A) show co-expression of MOR1, ALDH1A1, and GFP in striatal neurons. Scale bar: 50 $\mu$ m.

Fig. S7

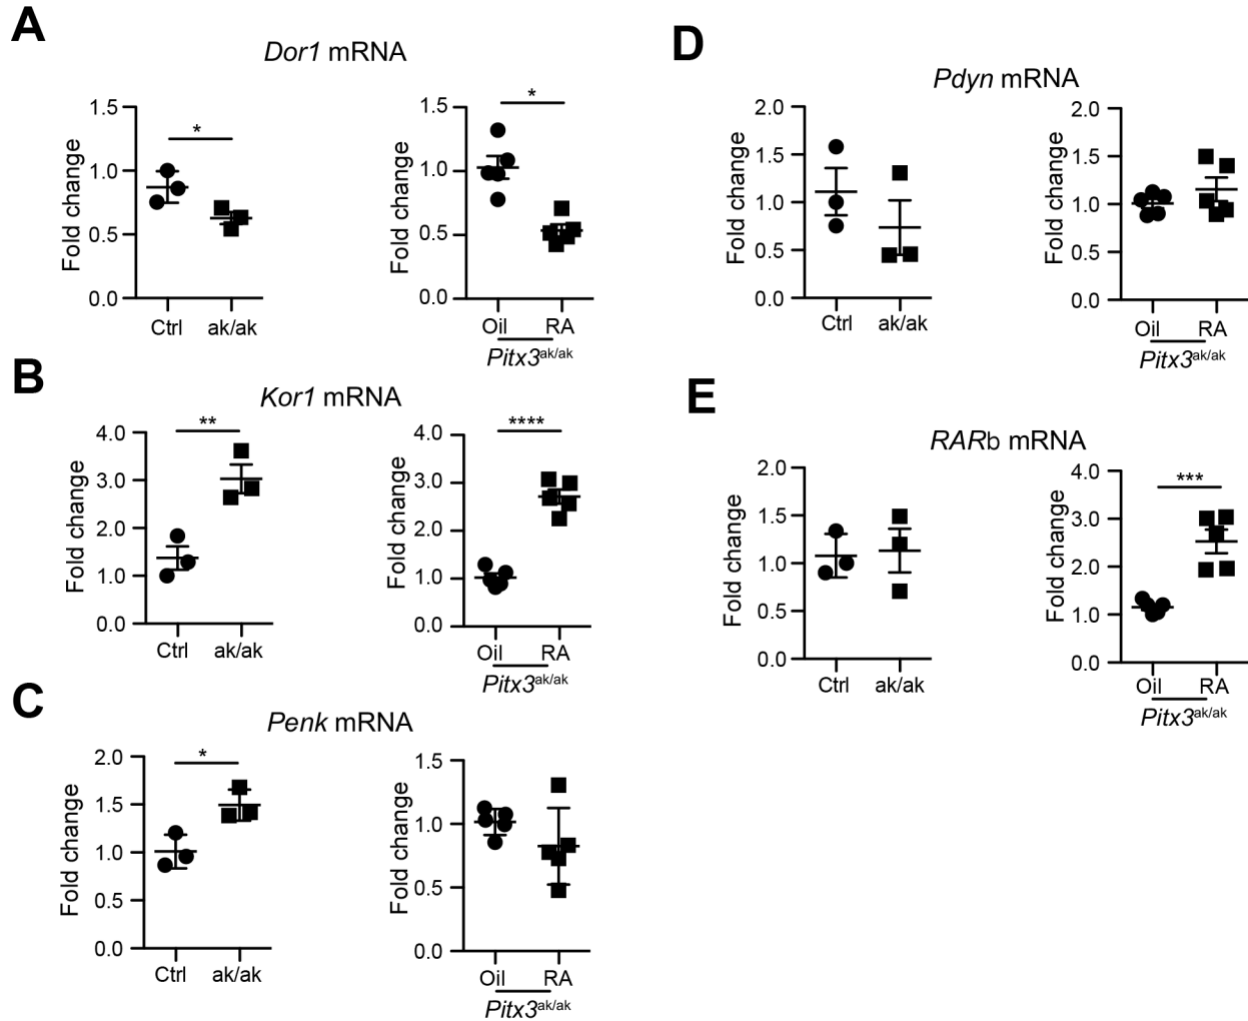

**Fig. S7 Alterations of endogenous opioid receptor and peptide mRNA as well as retinoic acid receptor mRNA expression in the dDS of *Pitx3<sup>ak/ak</sup>* mice.** Scatter plots compare *Dor1* (A), *Kor1* (B), *Penk* (C), *Pdyn* (D), *RARβ* (E) mRNA levels in the DS of 3-month-old control (Ctrl) and *Pitx3<sup>ak/ak</sup>* mice (left panel), as well as 3-month-old *Pitx3<sup>ak/ak</sup>* mice after treated with oil or RA for seven days (right panel). Data were presented as mean  $\pm$  SEM. Unpaired t test, (A)  $t_4=2.838$ ,  $p=0.023$  (left panel);  $t_8=4.928$ ,  $p=0.0006$  (right panel). (B)  $t_4=4.296$ ,  $p=0.0063$  (left panel);  $t_8=9.901$ ,  $p<0.0001$  (right panel). (C)  $t_4=3.515$ ,  $p=0.00123$  (left panel);  $t_8=1.350$ ,  $p=0.1070$  (right panel). (D)  $t_4=0.9960$ ,  $p=0.1871$  (left panel);  $t_8=1.109$ ,  $p=0.1499$  (right panel). (E)  $t_4=0.2005$ ,  $p=0.4254$  (left panel);  $t_8=5.462$ ,  $p=0.0003$  (right panel).



## Supplementary Video

**Video clip** shows a pair of 4-month-old male littermate *Pitx3<sup>ak/ak</sup>* mice in a Perspex box after treated with RA or oil for 7 days and then with L-DOPA. The dyskinetic movements consist with a vertical position of trunk supported by 1 or 2 hind limbs, and the repeated waving of forelimbs along the cage walls. The recording started 30 min after injecting the mice with 10mg/kg L-DOPA together with 5mg/kg benserazide.
